# Supplementary material for: Selenium-deficient diet induces necroptosis in the pig brain by activating TNFR1 via mir-29a-3p
Source: Royal Society of Chemistry journal article supplement (doi:10.1039/d0mt00032a), 2020-05-28
Supplement: d0mt00032a2.pdf [file d0mt00032a2.pdf]

Table S3

|                       | Control  | Mimic     | Inhibitor |
|-----------------------|----------|-----------|-----------|
| TNF- $\alpha$ (PCR) 1 | 1        | 0.4569157 | 1.741101  |
| TNF- $\alpha$ (PCR) 2 | 1.028601 | 0.7022225 | 2.479415  |
| TNF- $\alpha$ (PCR) 3 | 1.032638 | 0.5586436 | 2.173470  |
| FADD(PCR) 1           | 1        | 0.8408964 | 2.203810  |
| FADD(PCR) 2           | 1.002192 | 0.7371346 | 2.099433  |
| FADD(PCR) 3           | 1.041341 | 0.6328783 | 3.917681  |
| CYLD(PCR) 1           | 1        | 0.3120826 | 1.125059  |
| CYLD(PCR) 2           | 1.013721 | 0.301452  | 1.385109  |
| CYLD(PCR) 3           | 1.016273 | 0.2146414 | 1.319508  |
| RIPK1(PCR) 1          | 1        | 0.3077861 | 1.310393  |
| RIPK1(PCR) 2          | 1.024035 | 0.2973018 | 1.132884  |
| RIPK1(PCR) 3          | 1.029096 | 0.2660925 | 0.9460576 |
| RIPK3(PCR) 1          | 1        | 0.7320428 | 1.274561  |
| RIPK3(PCR) 2          | 1.016804 | 0.7169776 | 1.310393  |
| RIPK3(PCR) 3          | 1.037275 | 0.5176325 | 1.101905  |
| MLKL(PCR) 1           | 1        | 0.2812646 | 1.385109  |
| MLKL(PCR) 2           | 0.997054 | 0.2146414 | 1.347234  |
| MLKL(PCR) 3           | 1.011129 | 0.2660925 | 1.366040  |
| caspase 8 (PCR) 1     | 1        | 1.356604  | 0.6070974 |
| caspase 8 (PCR) 2     | 1.062322 | 1.292353  | 0.641713  |
| caspase 8 (PCR) 3     | 0.980769 | 0.9862327 | 0.4965462 |
| TNFR1(PCR) 1          | 1        | 0.8467453 | 1.409717  |
| TNFR1(PCR) 2          | 1.001621 | 0.5069798 | 1.197479  |
| TNFR1(PCR) 3          | 1.012322 | 0.7737825 | 1.305265  |
