# Supplementary material for: Selenium-deficient diet induces necroptosis in the pig brain by activating TNFR1 via mir-29a-3p
Source: Royal Society of Chemistry journal article supplement (doi:10.1039/d0mt00032a), 2020-05-28
Supplement: d0mt00032a3.pdf [file d0mt00032a3.pdf]

Table S4

|                      | Control   | Mimic     | Inhibitor | Inhibitor+Nec-1 | Inhibitor+Nac |
|----------------------|-----------|-----------|-----------|-----------------|---------------|
| TNF- $\alpha$ (WB) 1 | 0.5402806 | 0.3960735 | 1.21492   | 0.9628382       | 0.9090328     |
| TNF- $\alpha$ (WB) 2 | 0.5796209 | 0.3757749 | 1.053182  | 0.9173378       | 0.861211      |
| TNF- $\alpha$ (WB) 3 | 0.5029533 | 0.377637  | 0.9438573 | 0.922376        | 0.8868352     |
| RIPK3(WB) 1          | 0.5518378 | 0.2951638 | 0.8891039 | 0.529585        | 0.6736497     |
| RIPK3(WB) 2          | 0.5486895 | 0.3769364 | 0.8295057 | 0.5573422       | 0.7033265     |
| RIPK3(WB) 3          | 0.5578849 | 0.3896415 | 0.8300992 | 0.5589425       | 0.7208499     |
| TNFR1(WB) 1          | 0.9376539 | 0.6874242 | 1.231305  | 0.8988492       | 0.9692516     |
| TNFR1(WB) 2          | 0.8143606 | 0.60826   | 1.162189  | 0.8436118       | 0.8980398     |
| TNFR1(WB) 3          | 0.8804241 | 0.6382229 | 1.253137  | 0.8305801       | 0.9620286     |
| MLKL(WB) 1           | 0.6009967 | 0.4419644 | 0.8362966 | 0.7904191       | 0.7899758     |
| MLKL(WB) 2           | 0.5871856 | 0.4636051 | 0.8524796 | 0.7195362       | 0.8116782     |
| MLKL(WB) 3           | 0.5824723 | 0.4769503 | 0.8240305 | 0.6897326       | 0.7063087     |
| caspase 8(WB) 1      | 1.169874  | 1.390899  | 0.961155  | 1.152638        | 1.044659      |
| caspase 8(WB) 2      | 1.129409  | 1.507846  | 0.8966311 | 1.109663        | 1.045558      |
| caspase 8(WB) 3      | 1.174345  | 1.56318   | 0.9225393 | 1.146612        | 1.110827      |
