# Supplementary material for: Selenium-deficient diet induces necroptosis in the pig brain by activating TNFR1 via mir-29a-3p
Source: Royal Society of Chemistry journal article supplement (doi:10.1039/d0mt00032a), 2020-05-28
Supplement: d0mt00032a4.pdf [file d0mt00032a4.pdf]

Table S1

|                     | Control 1 | Control 2 | Control 3 | Se-deficient 1 | Se-deficient 2 | Se-deficient 3 |
|---------------------|-----------|-----------|-----------|----------------|----------------|----------------|
| TNF- $\alpha$ (PCR) | 1         | 0.980174  | 0.988897  | 4.14106        | 3.317278       | 4.084048       |
| TNFR1(PCR)          | 1         | 1.032811  | 1.021145  | 2.114036       | 2.514027       | 1.918528       |
| FADD(PCR)           | 1         | 1.000416  | 1.00125   | 2.639016       | 2.329467       | 2.250117       |
| CYLD(PCR)           | 1         | 1.002738  | 1.005477  | 1.248331       | 1.028114       | 1.526259       |
| RIPK1(PCR)          | 1         | 0.981598  | 0.994145  | 2.948539       | 2.013911       | 2.8481         |
| RIPK3(PCR)          | 1         | 0.990515  | 0.988041  | 3.226567       | 3.116658       | 3.386981       |
| MLKL(PCR)           | 1         | 1.002062  | 0.971468  | 3.78423        | 3.887858       | 3.72397        |
| caspase 8(PCR)      | 1         | 0.991896  | 0.983793  | 0.3120826      | 0.2660925      | 0.2642545      |
| mir-29a-3p(PCR)     | 1         | 1.007419  | 0.944765  | 0.7578583      | 0.8645372      | 0.8111975      |
| GPX1(PCR)           | 1         | 0.976667  | 0.994167  | 0.6585654      | 0.7526234      | 0.7631296      |
| GPX2(PCR)           | 1         | 0.998708  | 0.971585  | 0.858091       | 1.031536       | 0.828072       |
| GPX3(PCR)           | 1         | 0.999619  | 0.989734  | 0.89889        | 0.861985       | 0.858091       |
| GPX4(PCR)           | 1         | 0.976975  | 1.001354  | 1.086735       | 0.964086       | 0.815717       |
| DIO1(PCR)           | 1         | 1.017091  | 1.016727  | 2.938094       | 2.116658       | 2.388934       |
| DIO2(PCR)           | 1         | 1.030808  | 0.957119  | 2.73208        | 2.143547       | 1.117287       |
| DIO3(PCR)           | 1         | 1.004071  | 1.005429  | 1.243217       | 1.028053       | 0.916298       |
| SELM(PCR)           | 1         | 0.964352  | 0.971407  | 0.313376       | 0.42839        | 0.294364       |
| SELN(PCR)           | 1         | 0.967925  | 0.939191  | 0.5456757      | 0.5697193      | 0.575309       |
| SELO(PCR)           | 1         | 1.002328  | 0.981762  | 3.530812       | 2.756828       | 2.531513       |
| SELS(PCR)           | 1         | 1.013075  | 0.997048  | 1.172835       | 1.292353       | 1.802501       |
| SEPP1(PCR)          | 1         | 0.996411  | 0.994359  | 0.301342       | 0.514027       | 0.214195       |
| SELK(PCR)           | 1         | 0.997073  | 1.011219  | 0.8975103      | 0.9035487      | 0.8851909      |
| SELH(PCR)           | 1         | 1.007102  | 1.013316  | 1.377175       | 1.897077       | 1.276673       |
| SELV(PCR)           | 1         | 0.984237  | 1.001153  | 0.6234931      | 0.6456364      | 0.5763144      |
| SELT(PCR)           | 1         | 1.015588  | 1.012282  | 0.3142533      | 0.3368084      | 0.3609823      |
| SELW(PCR)           | 1         | 1.041903  | 1.026384  | 0.3634931      | 0.6461764      | 0.5783441      |
| SEPX1(PCR)          | 1         | 1.001609  | 1.011665  | 0.949121       | 1.292353       | 1.156688       |
| SEPHS2(PCR)         | 1         | 1.005344  | 1.014577  | 0.6285067      | 0.6783022      | 0.7219646      |
| SELI(PCR)           | 1         | 1.010552  | 0.993506  | 1.394294       | 1.11396        | 1.357018       |
| SEP15(PCR)          | 1         | 0.993039  | 1.012529  | 0.5509526      | 0.5625293      | 0.6506709      |
| TXNRD1(PCR)         | 1         | 1.012524  | 1.003795  | 1.214195       | 0.814214       | 0.928171       |
| TXNRD2(PCR)         | 1         | 1.044577  | 1.034918  | 0.566852       | 0.840375       | 0.658639       |
| TXNRD3(PCR)         | 1         | 1.027519  | 1.136047  | 0.840352       | 1.00375        | 1.07375        |
| TNF- $\alpha$ (WB)  | 0.9811077 | 0.8627571 | 0.8627976 | 1.090398       | 1.026953       | 0.9990003      |
| RIPK3(WB)           | 1.189204  | 1.038023  | 1.027377  | 1.670712       | 1.584173       | 1.536212       |
| MLKL(WB)            | 0.8170491 | 0.7289298 | 0.7488834 | 1.410681       | 1.368572       | 1.30865        |
| Caspase8(WB)        | 1.980816  | 1.483839  | 1.751931  | 1.261851       | 1.199156       | 1.290575       |
| TNFR1(WB)           | 2.132695  | 1.878597  | 1.908552  | 2.838259       | 2.829185       | 2.766768       |
